# Supplementary material
Source: ML conference proceedings conference paper supplement (https://proceedings.mlr.press/v139/touvron21a.html)
Supplement: Supplementary file [file touvron21a-supp.pdf]

## Supplementary material

## Training data-efficient image transformers &amp; distillation through attention

This supplemental material provides complementary tables referred in the main document, in particular a more detailed description of the datasets that we used for transfer learning in Table 8. Table 9 provides the hyper-parameters used for Imagenet1k training. Table 10 compares different complexity measures of DeiT against state-of-the-art convnets and transformers. We also provide the PyTorch `code` associated with our paper in the supplemental material.

Table 8. Datasets used for our different tasks.

| Dataset                                  | Train size | Test size | #classes |
|------------------------------------------|------------|-----------|----------|
| ImageNet (Russakovsky et al., 2015)      | 1,281,167  | 50,000    | 1000     |
| iNaturalist 2018 (Horn et al., 2018)     | 437,513    | 24,426    | 8,142    |
| iNaturalist 2019 (Horn et al., 2019)     | 265,240    | 3,003     | 1,010    |
| Flowers-102 (Nilsback & Zisserman, 2008) | 2,040      | 6,149     | 102      |
| Stanford Cars (Krause et al., 2013)      | 8,144      | 8,041     | 196      |
| CIFAR-100 (Krizhevsky, 2009)             | 50,000     | 10,000    | 100      |
| CIFAR-10 (Krizhevsky, 2009)              | 50,000     | 10,000    | 10       |

Table 9. Ingredients and hyper-parameters for ViT-B (Dosovitskiy et al., 2020) and our method.

| Methods                    | ViT-B        | DeiT-B                                       |
|----------------------------|--------------|----------------------------------------------|
| Epochs                     | 300          | 300                                          |
| Batch size                 | 4096         | 1024                                         |
| Optimizer                  | AdamW        | AdamW                                        |
| learning rate              | 0.003        | $0.0005 \times \frac{\text{batchsize}}{512}$ |
| Learning rate decay        | cosine       | cosine                                       |
| Weight decay               | 0.3          | 0.05                                         |
| Warmup epochs              | 3.4          | 5                                            |
| Label smoothing $\epsilon$ | $\times$     | 0.1                                          |
| Dropout                    | 0.1          | $\times$                                     |
| Stoch. Depth               | $\times$     | 0.1                                          |
| Repeated Aug               | $\times$     | $\checkmark$                                 |
| Gradient Clip.             | $\checkmark$ | $\times$                                     |
| Rand Augment               | $\times$     | 9/0.5                                        |
| Mixup prob.                | $\times$     | 0.8                                          |
| Cutmix prob.               | $\times$     | 1.0                                          |
| Erasing prob.              | $\times$     | 0.25                                         |

Table 10. Measures of efficiency of our DeiT models with transformers and convnets architecture.

| Model                                                                                                     | Top-1 acc. | #params $\times 10^6$ | FLOPs $\times 10^9$ | im/s GPU (BS=1,fp16) | im/s GPU (BS=1,fp32) | im/s GPU (BS=32,fp16) | im/s GPU (BS=32,fp32) | im/s CPU (BS=1) | im/s CPU (BS=32) | GPU mem. used (BS=32,fp32) |
|-----------------------------------------------------------------------------------------------------------|------------|-----------------------|---------------------|----------------------|----------------------|-----------------------|-----------------------|-----------------|------------------|----------------------------|
| EfficientNet B7                                                                                           | 84.3       | 66                    | 37.0                | 20.5                 | 26.1                 | 90.8                  | 54.3                  | 0.6             | 0.5              | 6207.0 MB                  |
| ViT-B                                                                                                     | 77.9       | 86                    | 55.4                | 76.8                 | 71.6                 | 192.8                 | 89.3                  | 2.2             | 1.9              | 1686.2 MB                  |
| DeiT-Ti                | 76.6       | 6                     | 1.2                 | 78.5                 | 99.0                 | 2363.2                | 2386.4                | 37.3            | 84.9             | 97.6 MB                    |
| DeiT-S                 | 82.6       | 22                    | 4.6                 | 76.5                 | 95.5                 | 1693.0                | 942.5                 | 15.1            | 26.9             | 217.5 MB                   |
| DeiT-B                 | 84.2       | 87                    | 17.5                | 79.5                 | 95.0                 | 745.5                 | 303.9                 | 5.5             | 7.1              | 579.2 MB                   |
| DeiT-B  $\uparrow$ 384 | 85.2       | 87                    | 55.4                | 76.6                 | 71.5                 | 192.7                 | 89.3                  | 2.1             | 1.9              | 1693.7 MB                  |
